# Supplementary material for: Anti-oxidative stress regulator NF-E2-related factor 2 mediates the adaptive induction of antioxidant and detoxifying enzymes by lipid peroxidation metabolite 4-hydroxynonenal
Source: PubMed Central journal article supplement (PMC3519783; doi:10.1186/2045-3701-2-40), 2012-11-28

## Supplemental figure

Molar excess  
of 4-HNE

0X

5X

10X

25X

50X

4-HNE

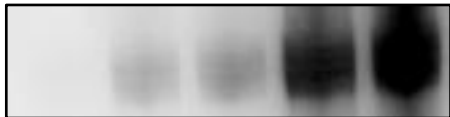

NRF2

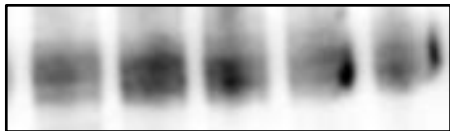

Supplement: 2045-3701-2-40-S1.pdf [file 2045-3701-2-40-S1.pdf]
